- of the carotid and vertebral arteries. *Am J Physiology* 1956; 186:275-7
10. Albrecht RF, Miletich DJ, Rosenberg R, Zahed B: Cerebral blood flow and metabolic changes from induction to onset of anesthesia with halothane or pentobarbital. *ANESTHESIOLOGY* 1977; 47:252-6
  11. Antognini JF, Eisele PH: Anesthetic potency and cardiopulmonary effects of enflurane, halothane, and isoflurane in goats. *Lab Anim Sci* 1993; 43:607-10
  12. Antognini JF: Hypothermia eliminates isoflurane requirements at 20 degrees C. *ANESTHESIOLOGY* 1993; 78:1152-6
  13. Rampil IJ, Mason P, Singh H: Anesthetic potency (MAC) is independent of forebrain structures in the rat. *ANESTHESIOLOGY* 1993; 78:707-12
  14. Bernard C: *Anesthetics, Lectures on Anesthetics and on Asphyxia*. Paris, J-B Balliere & Son 1875; pp 70-84
  15. Barter LS, Mark LO, Smith AC, Antognini JF: Isoflurane potency in the northern leopard frog *Rana pipiens* is similar to that in mammalian species and is unaffected by decerebration. *Vet Res Commun* 2007; 31:757-63
  16. Yang J, Chai YF, Gong CY, Li GH, Luo N, Luo NF, Liu J: Further proof that the spinal cord, and not the brain, mediates the immobility produced by inhaled anesthetics. *ANESTHESIOLOGY* 2009; 110:591-5
  17. Jinks SL, Atherley RJ, Dominguez CL, Sigvardt KA, Antognini JF: Isoflurane disrupts central pattern generator activity and coordination in the lamprey isolated spinal cord. *ANESTHESIOLOGY* 2005; 103:567-75

## ANESTHESIOLOGY REFLECTIONS

### 25 Years of Curating for the Wood Library-Museum

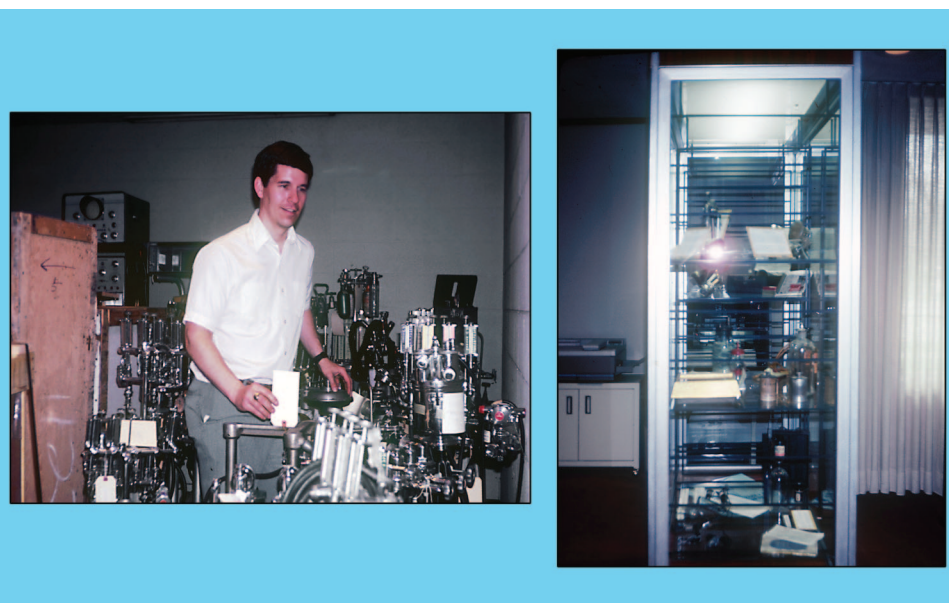

In 1986 one of my then colleagues at Yale, a past editor-in-chief of *ANESTHESIOLOGY*, Dr. Nicholas Greene, had joined his fellow Wood Library-Museum (WLM) Trustee, Rod Calverley, in asking me to do at a national level what they had seen me do at Yale: set up a *bona fide* museum gallery. Consequently, 25 years ago this month, in March of 1987, I arrived at the WLM's Busse Highway address in Park Ridge, Illinois, on a scouting mission to transform the museum side of the WLM. Sadly our "national gallery" had dwindled down to a single display cabinet (*right*) in the photocopy room of the headquarters building of the American Society of Anesthesiologists. As "Acting Curator," I soon began exploring the basement of the two-story building. I was heartbroken to find myself wading through scores of vintage anesthesia machines that had been haphazardly crushed together inside a tiny room next to the furnace. Clearly my first task would be to inventory the large apparatus. . . . (Copyright © the American Society of Anesthesiologists, Inc. This image also appears in the *Anesthesiology Reflections* online collection available at [www.anesthesiology.org](http://www.anesthesiology.org).)

George S. Bause, M.D., M.P.H., Honorary Curator, ASA's Wood Library-Museum of Anesthesiology, Park Ridge, Illinois, and Clinical Associate Professor, Case Western Reserve University, Cleveland, Ohio. [UJYC@aol.com](mailto:UJYC@aol.com).
